# Supplementary material for: VEXAS syndrome is characterized by inflammasome activation and monocyte dysregulation
Source: PubMed Central journal article supplement (PMC10828464; doi:10.1038/s41467-024-44811-4), 2024-01-30
Supplement: 41467_2024_44811_MOESM1_ESM.pdf [file 41467_2024_44811_MOESM1_ESM.pdf]

|  |            |
|--|------------|
|  | MDS        |
|  | VEXAS-like |
|  | VEXAS      |

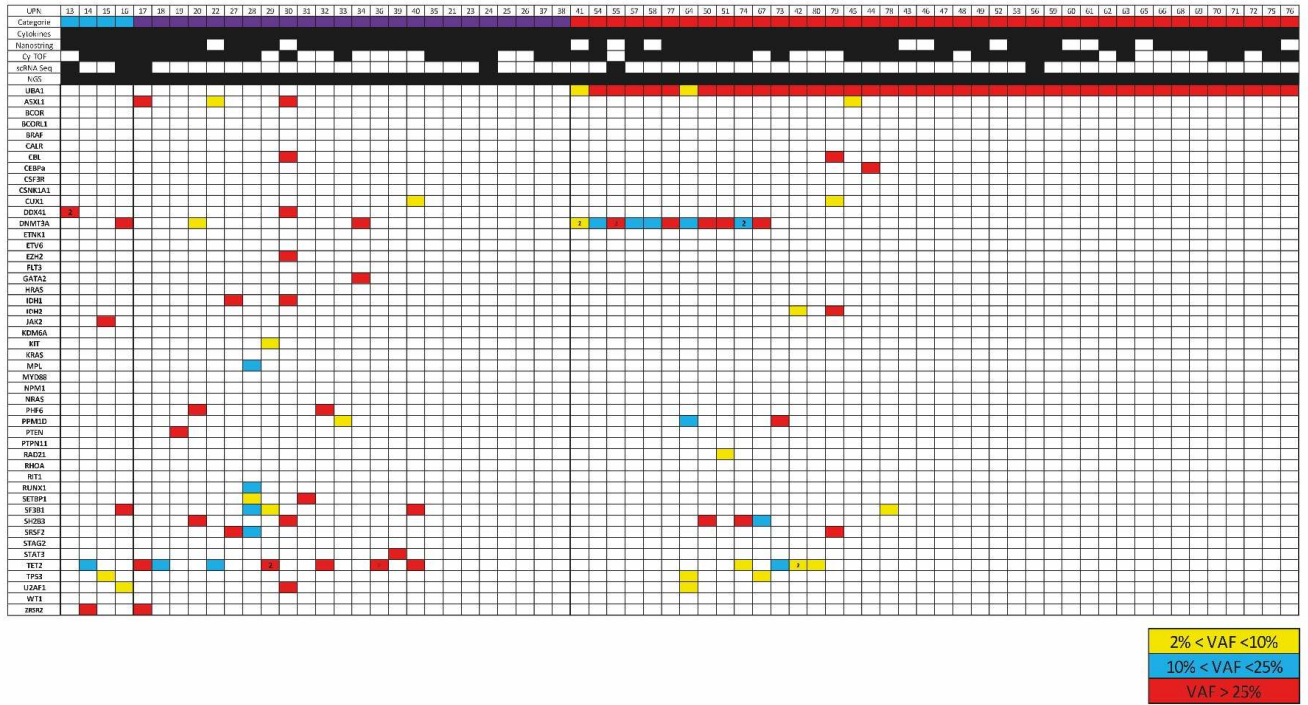

**Supplementary Fig. 1. Summary of OMICS analysis performed and the presence of genomic mutations present in all patients analyzed. An NGS analysis on genomic DNA was performed as previously reported (Papo et al) with a modified panel including the UBA1 full gene sequence ([NM 003334.4](https://www.ncbi.nlm.nih.gov/nuccore/NM_003334.4)). Among the 48 genes tested, mutations were found in 30 genes and indicated according to the VAF. All the 40 VEXAS patients present an UBA1 mutation with only two patients with low VAF and with at least one additional mutation in 18 cases. Four patients present 2 mutations of the same gene indicated by a “2” in the case (3 cases of DNMT3A and 1 case of TET2).**

**A**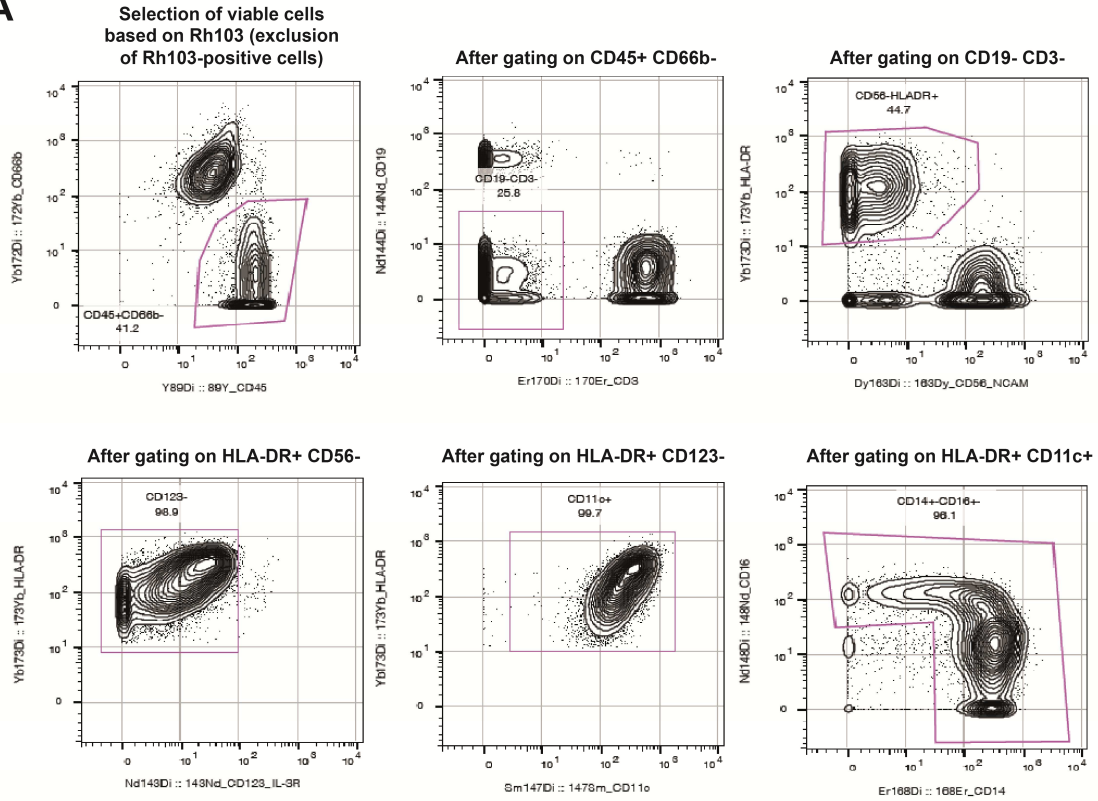**B**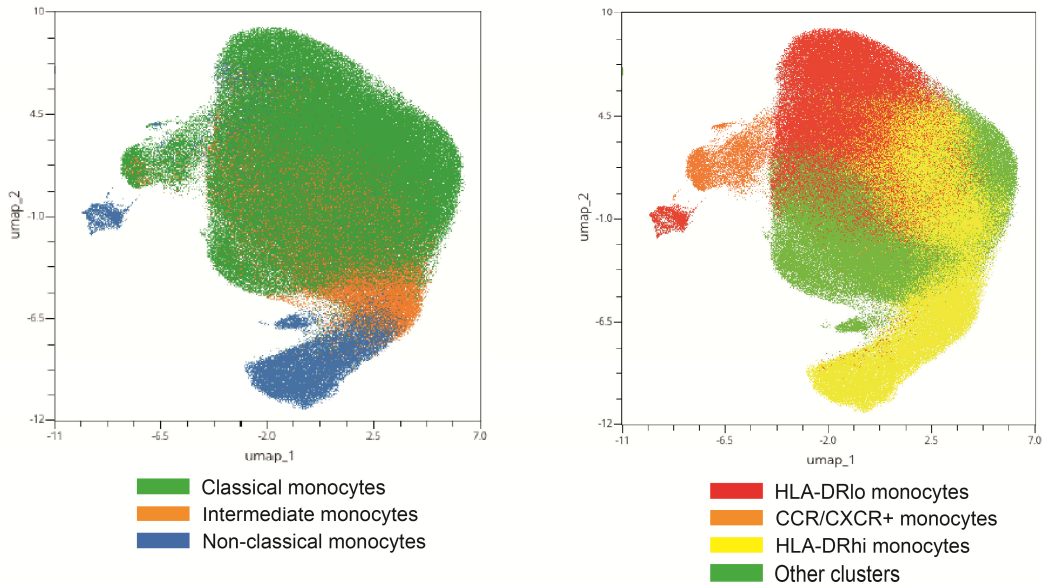

**Supplementary Fig. 2. Additional information on mass cytometry of patients. (A)** Gating strategy used for the analysis of monocytes. **(B)** Non-supervised Uniform Manifold Approximation and Projection (UMAP) of blood monocytes according to surface markers and main monocytes subsets.

### HLA-DR<sup>lo</sup> monocytes

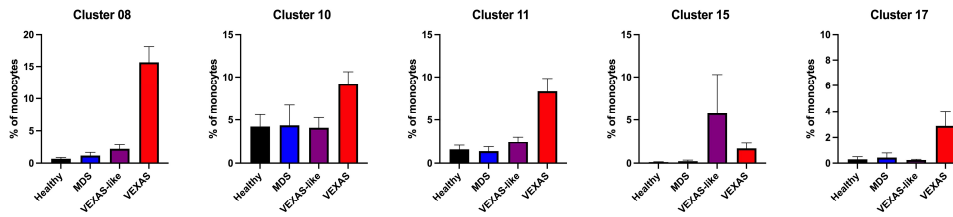

### CCR/CXCR+ exhausted monocytes

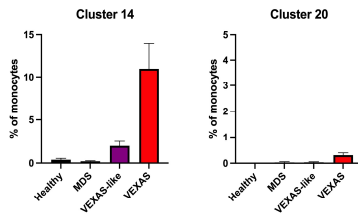

### HLA-DR<sup>hi</sup> monocytes

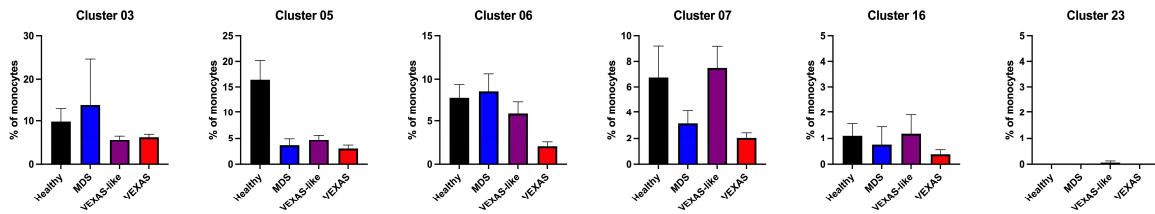

**Supplementary Fig. 3. Distribution of monocyte clusters among whole monocytes in patients with VEXAS syndrome, VEXAS-like, MDS and healthy controls.** Clusters 8, 10, 11, 15 and 17, corresponding to HLA-DR<sup>lo</sup> monocytes (detailed in upper panel), and clusters 14 and 20 (middle panel), corresponding to exhausted monocytes expressing chemokine receptors, are increased in VEXAS. Clusters 3, 5, 6, 7 and 16 (lower panel), corresponding to HLA-DR<sup>hi</sup> monocytes, are decreased in VEXAS.

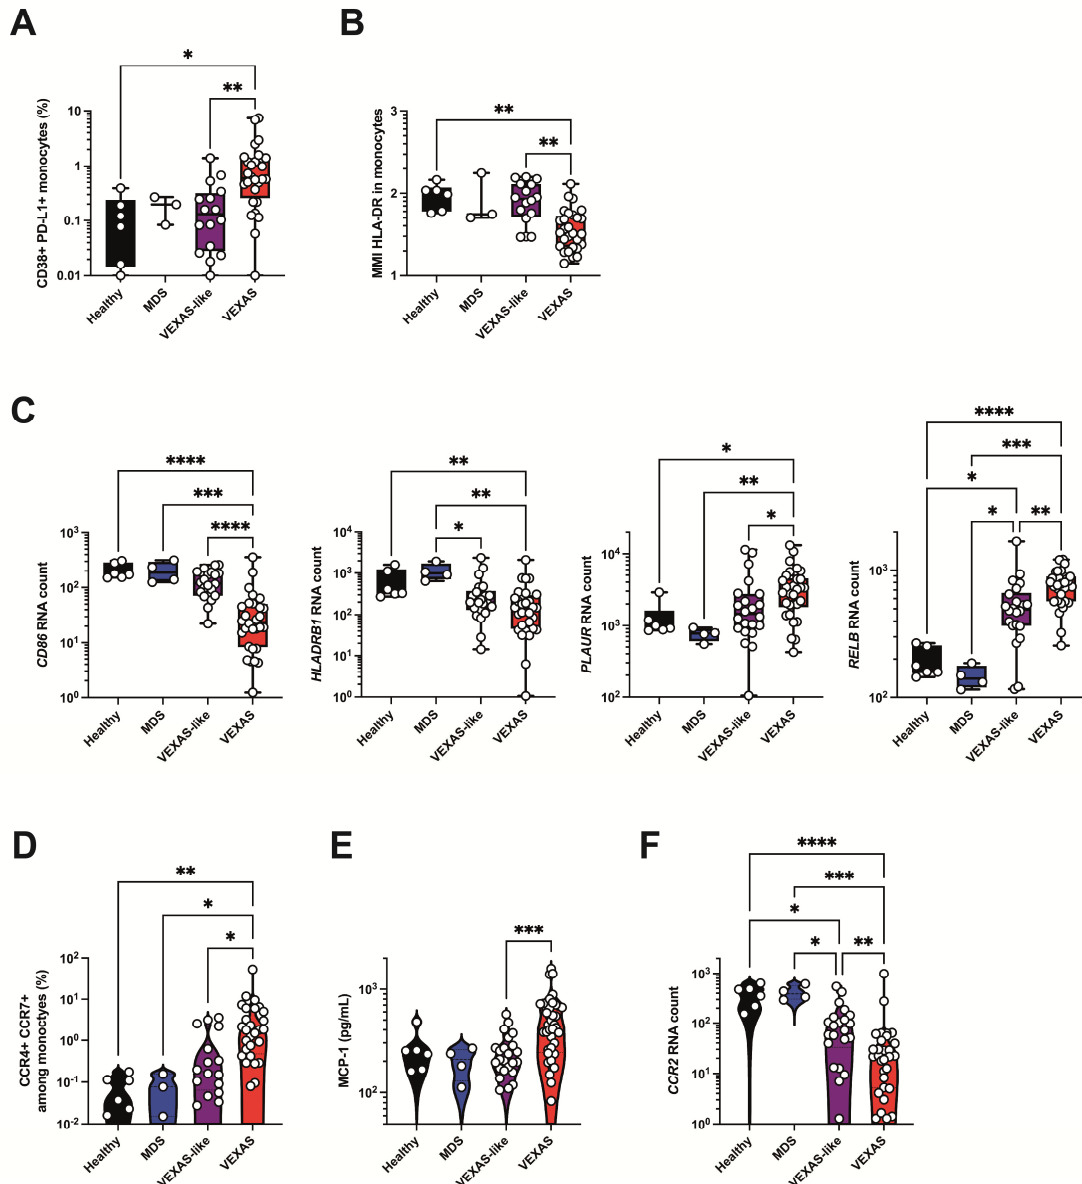

### Supplementary Fig. 4. Activation status of monocytes at cellular and molecular level.

Each dot represents a single patient studied as described by CyTOF, cytokines measurement or RNA studied by Nanostring nCounter analysis. **(A)** Analysis of exhausted monocytes based on the expression of CD38 and PD-L1 by mass cytometry. Each dot represents a single patient. **(B)** Cell surface expression of HLA-DR on monocytes, evaluated by mean metal intensity (MMI). **(C)** Absolute RNA counts using Nanostring nCounter technology and showing decreased expression of CD86 and HLADRB1, and increased expression of PLAUR and RELB transcripts in VEXAS in comparison to other groups. **(D)** Proportion (frequencies) of CCR4+ CCR7+ expressing monocytes. **(E)** CCL2/MCP-1 protein plasma concentration measured with Luminex technology, and **(F)** absolute RNA count for CCR2. Each dot represents a single patient. RNA data are extracted from the Nanostring nCounter analysis. P values were determined by the two-sided Kruskal-Wallis test, followed by Dunn's post test for multiple group comparisons. \*P < 0.05; \*\*P < 0.01; \*\*\*P < 0.001, \*\*\*\*P < 0.0001.

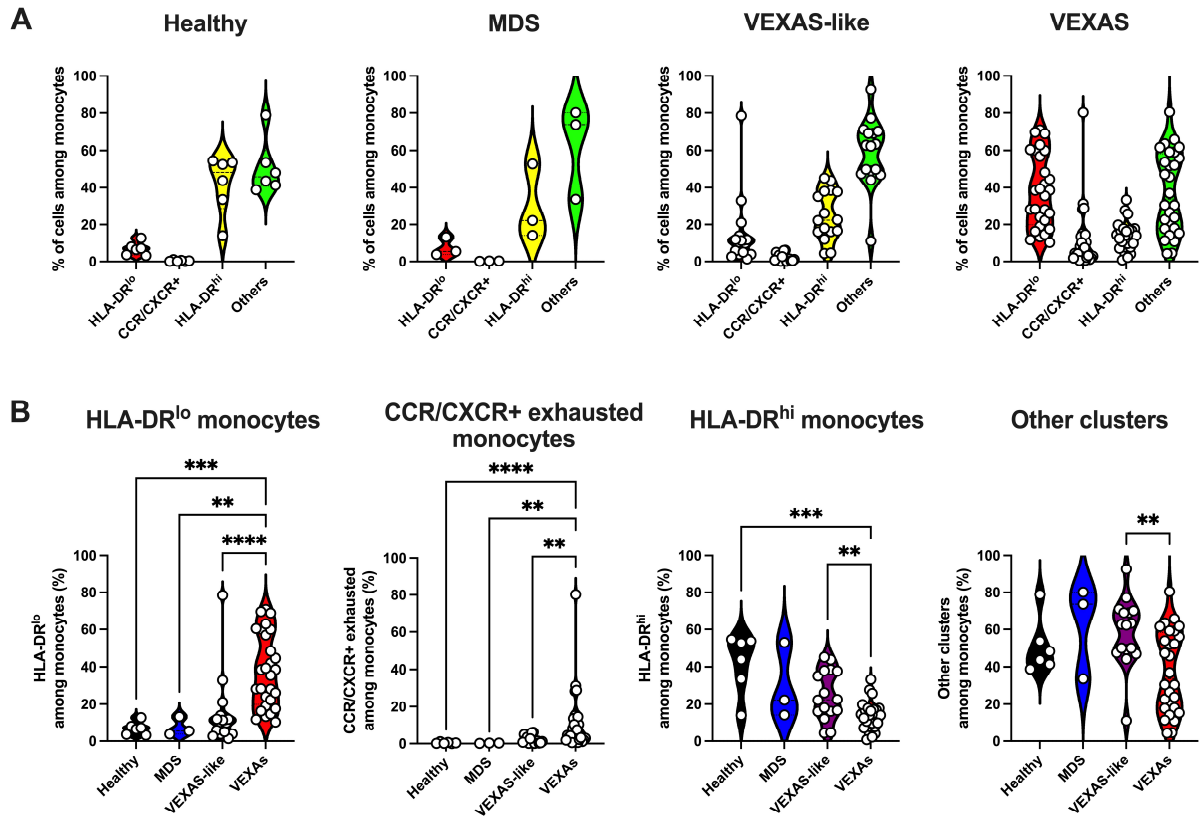

**Supplementary Fig. 5. Expression of cell markers by individual representation of the phenotypic clusters in each patient group.** (A) Representation of different monocytes clusters in each group of samples. (B) Individual representation of patients in each cluster allowing visualization of individual values from each patient group

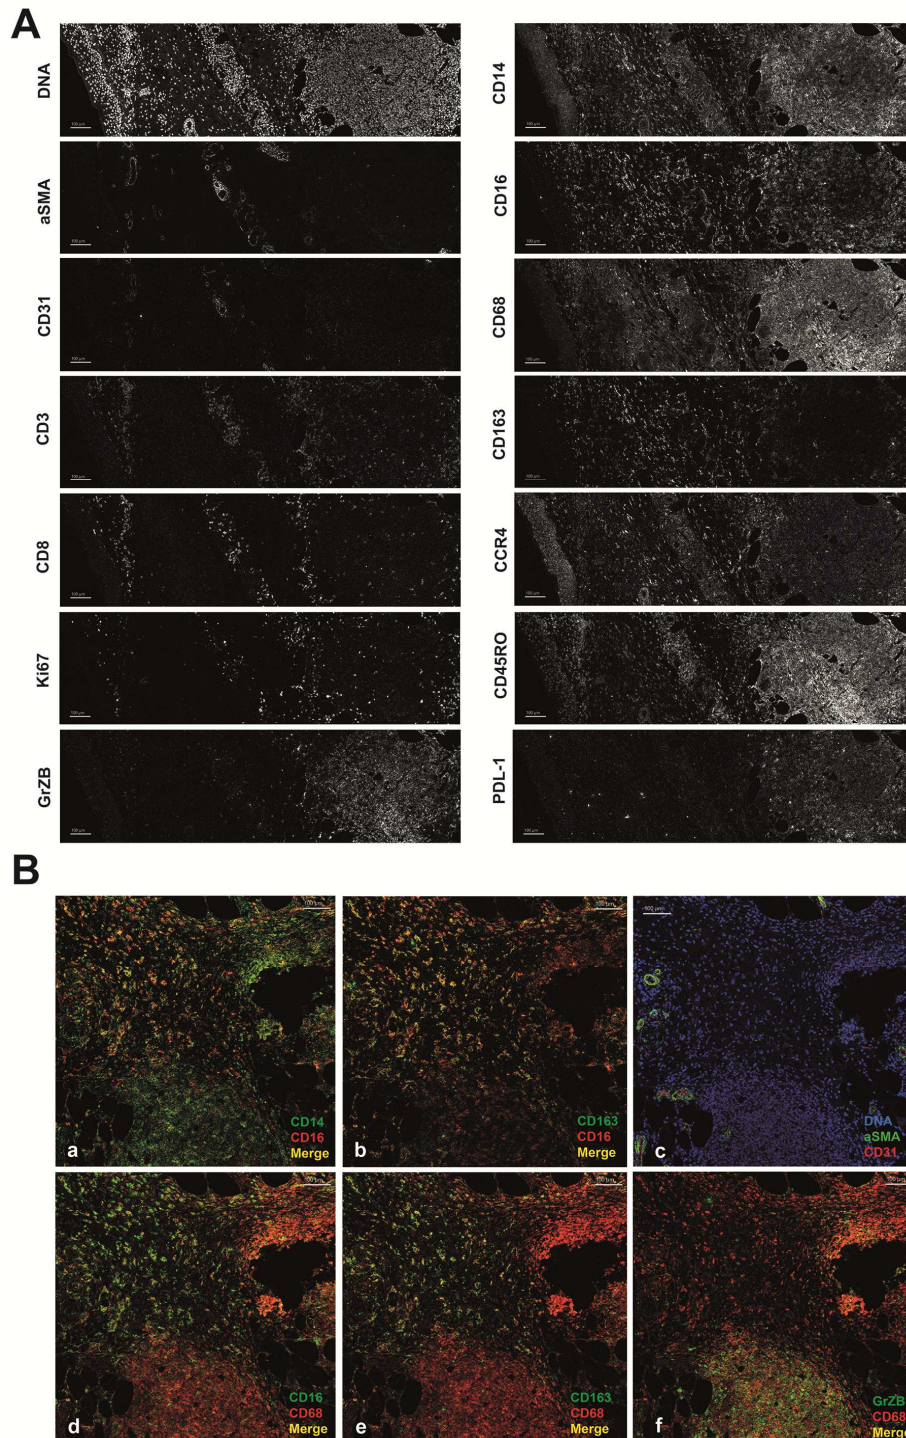

**Supplementary Fig.6. Expression of cell markers on pathological skin lesion from a VEXAS patient using imaging mass cytometry.**

(A) Imaging mass cytometry on skin biopsy showing expression of DNA, alpha-smooth muscle actin (aSMA), CD31, CD3, CD8, CD14, CD16, CD68, CD163, CCR4, Ki67, CD45RO, granzyme B (GrzB) and PDL-1. (B) Imaging mass cytometry on skin biopsy showing abundant nonclassical (CD14<sup>lo</sup>CD16<sup>+</sup>) and intermediate (CD14<sup>+</sup>CD16<sup>+</sup>) monocytes expressing CD163, adjacent to blood vessels, and CD68<sup>+</sup>CD163<sup>-</sup> M1 macrophages forming clusters away from blood vessels. Illustrative pictures are shown.

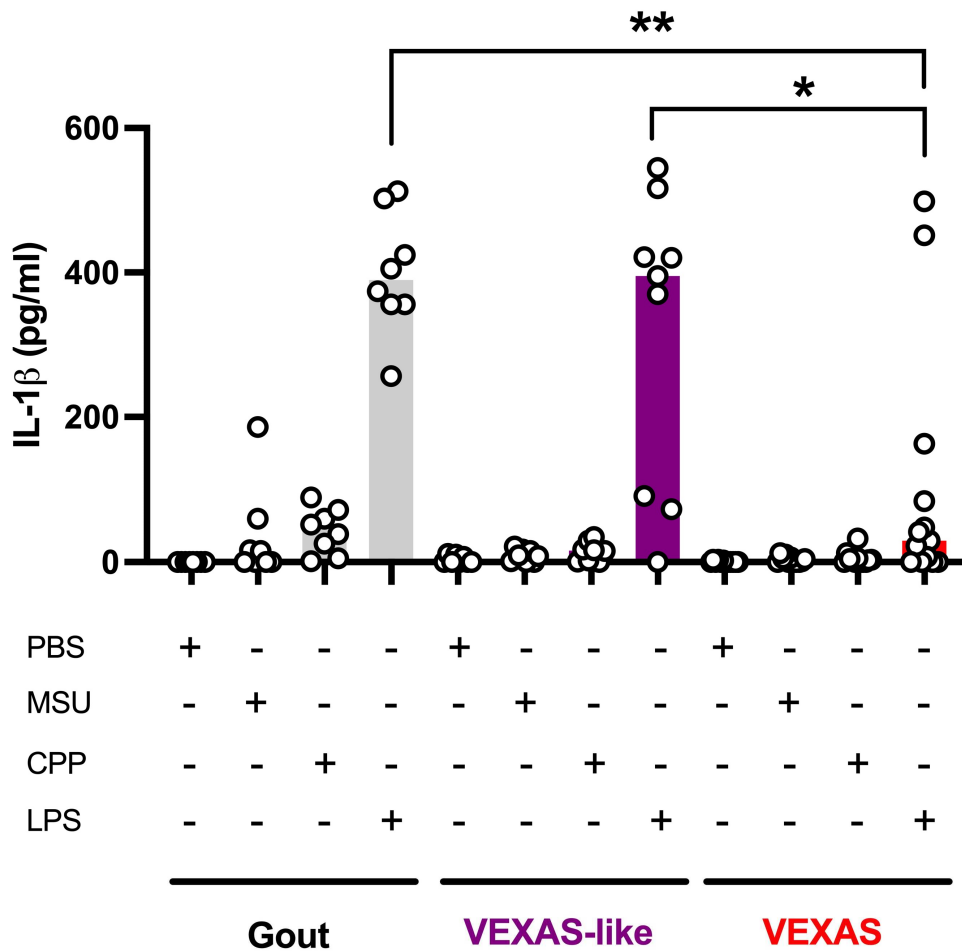

**Supplementary Fig. 7. Whole blood stimulation with crystals and LPS from patients with VEXAS, VEXAS-like and gout.**

Fresh blood were collected from VEXAS, VEXAS-like and gout patients and stimulated with PBS, monosodium urate (MSU), monoclinic calcium pyrophosphate dihydrate (m-CPPD) crystals (200  $\mu\text{g}/\text{ml}$ ) and LPS (10  $\text{ng}/\text{ml}$ ) for 24 hrs. IL-1 $\beta$  levels in supernatants were measured using ELISA.

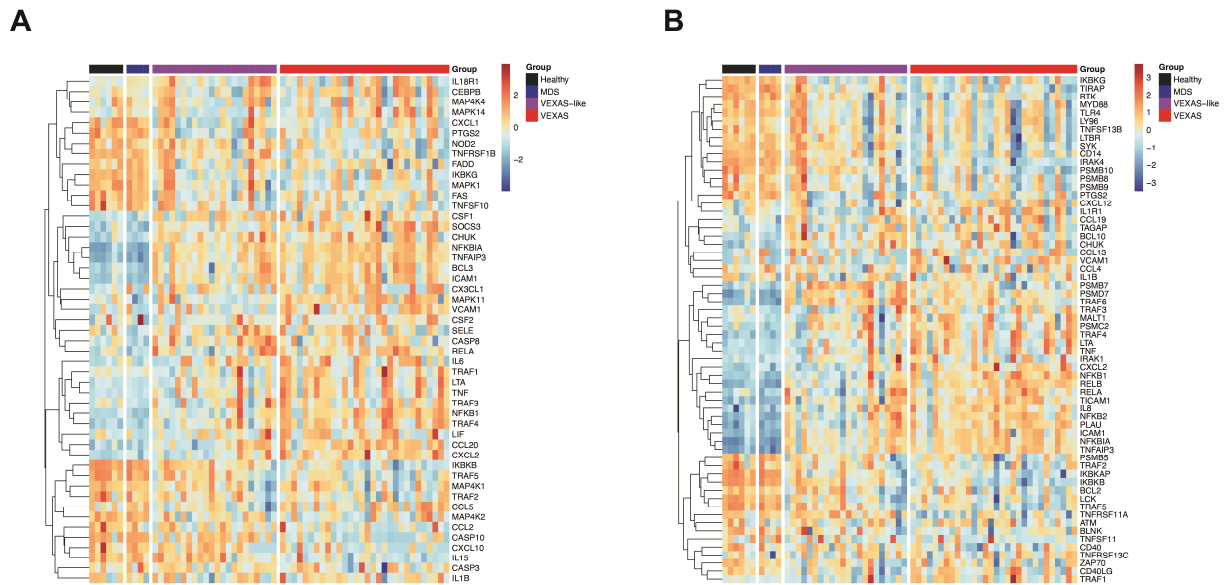

**Supplementary Fig. 8. TNF- $\alpha$  pathway signaling and NF $\kappa$ B signaling signatures in patients with VEXAS syndrome, VEXAS-like, MDS and healthy controls.**

**(A)** Heatmap representation of genes encoding proteins involved in TNF- $\alpha$  pathway signaling in each group. **(B)** Heatmap representation of genes encoding proteins involved in NF $\kappa$ B signaling in each group.





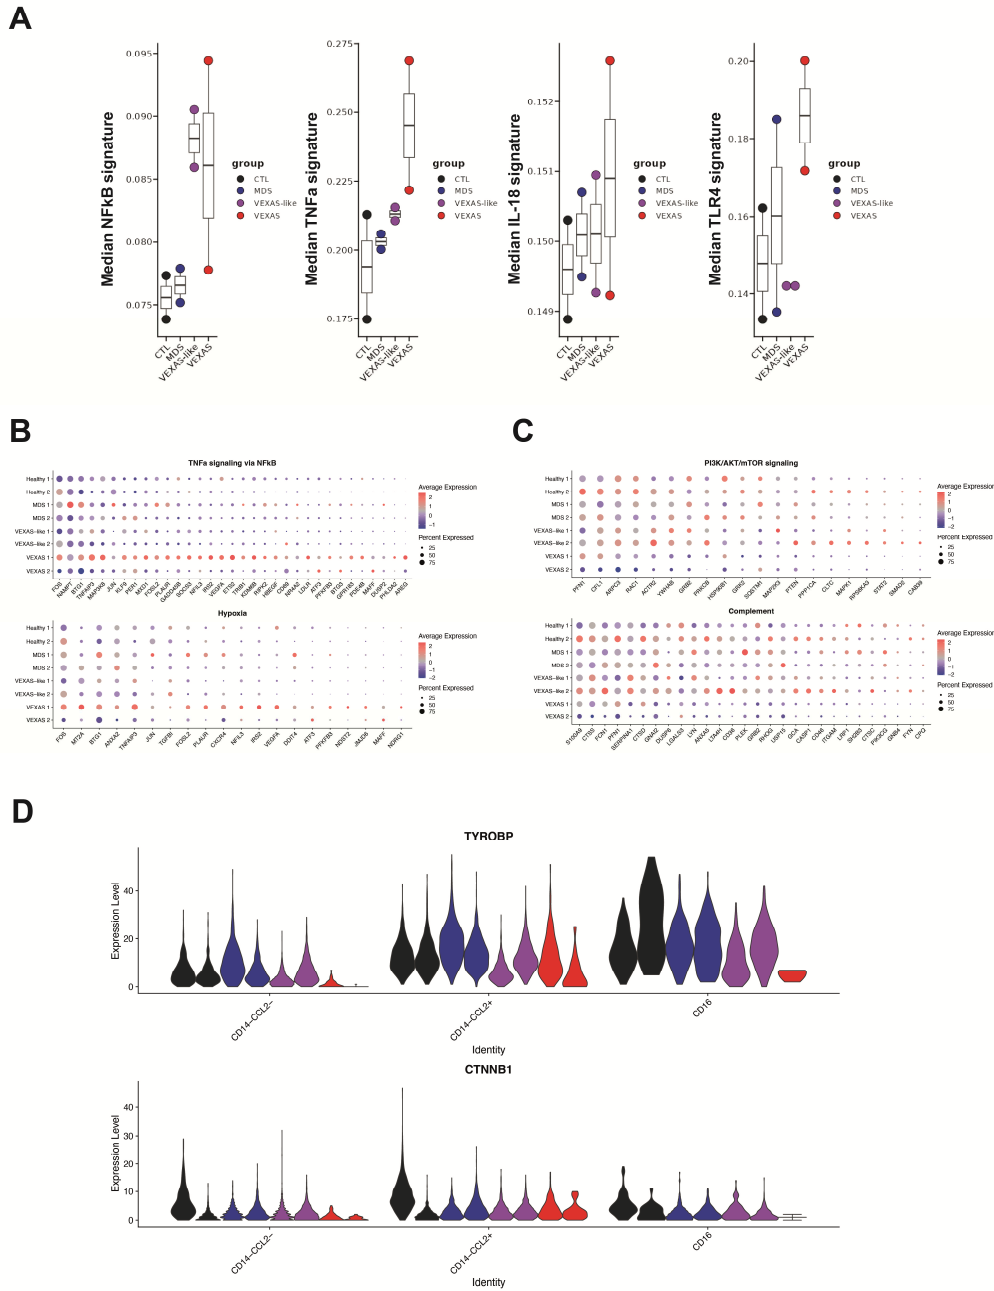

**Supplementary Fig. 10. Individual representation of single-cell transcriptomic data of monocytes in VEXAS syndrome.**

(A) IL-18, TNF- $\alpha$ , NF $\kappa$ B and TLR4 signaling gene expression signatures in monocytes from each patient. The size of the dot represents the percentage of cells in the clusters expressing the gene expression signature and the color intensity represents the average expression of the signature in that cluster. (B) Detailed analysis of the two most up-regulated pathways in monocytes from VEXAS, i.e. TNF- $\alpha$  signaling via NF $\kappa$ B pathway and hypoxia, from each patient. (C) Detailed analysis of the two most down-regulated pathways in monocytes from VEXAS, i.e. PI3K/AKT/mTOR signaling and complement pathways, from each patient. (D) Expression levels in each monocyte subsets of *TYROBP*, encoding for DAP12, and *CTNNB1*, encoding catenin beta-1, in from each patient.

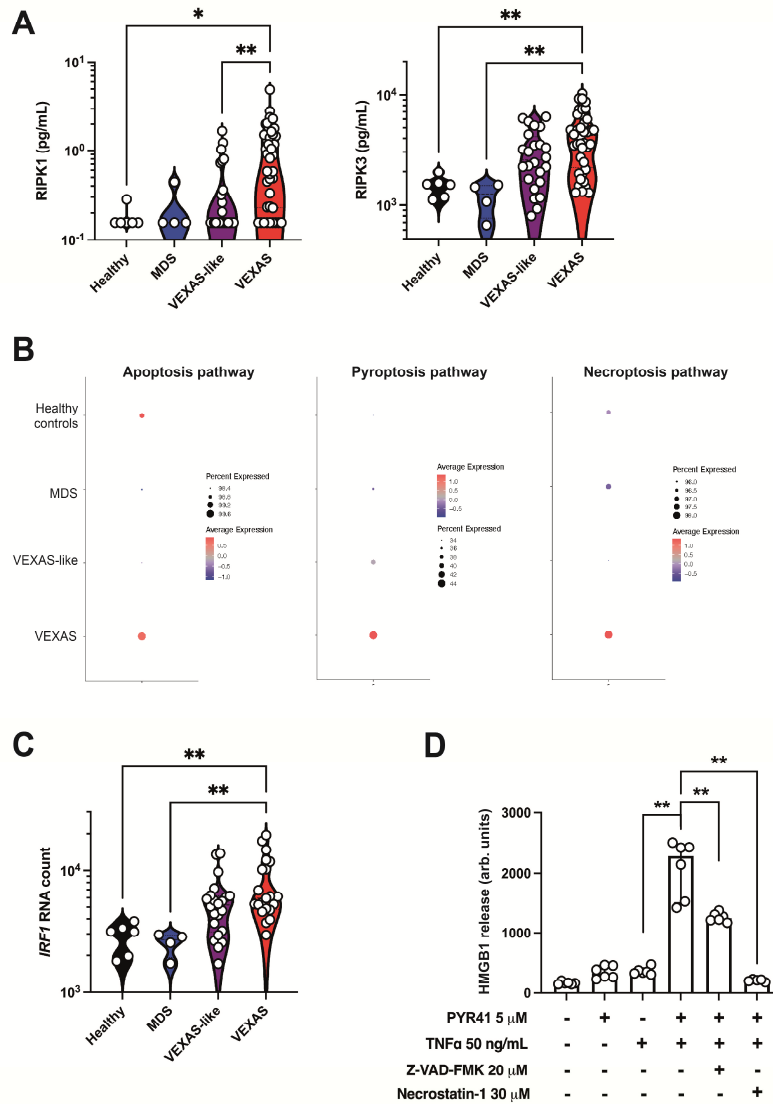

**Supplementary Fig. 11. Inflammatory programmed cell death pathway in monocytes from VEXAS syndrome and inductions of caspase and RIPK1 dependent HMGB1 release in THP-1 cells.**

(A) RIPK1 and RIPK3 plasma concentrations in patients with VEXAS, VEXAS-like, MDS and healthy controls. Each dot represents a single patient. (B) Apoptosis, pyroptosis and necroptosis gene expression signatures in monocytes from each patients' group. The size of the dot represents the percentage of cells in the clusters expressing the gene expression signature and the color intensity represents the average expression of the signature in that cluster. (C) Absolute RNA counts using Nanostring nCounter technology and showing decreased increased of *IRF1* transcripts in VEXAS. Each dot represents a single patient. (D) Co-treatment of PYR-41 and TNF- $\alpha$  Induces caspase and RIPK1 dependent HMGB1 release. THP-1-HMGB1-Lucia cells were pre-treated with a selective inhibitor of ubiquitin-activating enzyme E1 PYR-41 (5 $\mu$ M) with or without the pan-caspase inhibitor Z-VAD-FMK (20  $\mu$ M) or RIPK1 inhibitor Necrostatin-1 (30 $\mu$ M) for 1 hour prior to incubation with recombinant human TNF- $\alpha$  (50 ng/ml). Z-VAD-FMK and Necrostatin were used respectively at 20 $\mu$ M and 30 $\mu$ M. Twenty-four hours later, the luciferase activity was determined by measuring the luminescence with QUANTI-Luc<sup>TM</sup> detection reagent (Invivogen) in a luminometer. \*\*P  $\leq$  0.01. Analysis was performed using Mann-Whitney test. Data are shown as mean.

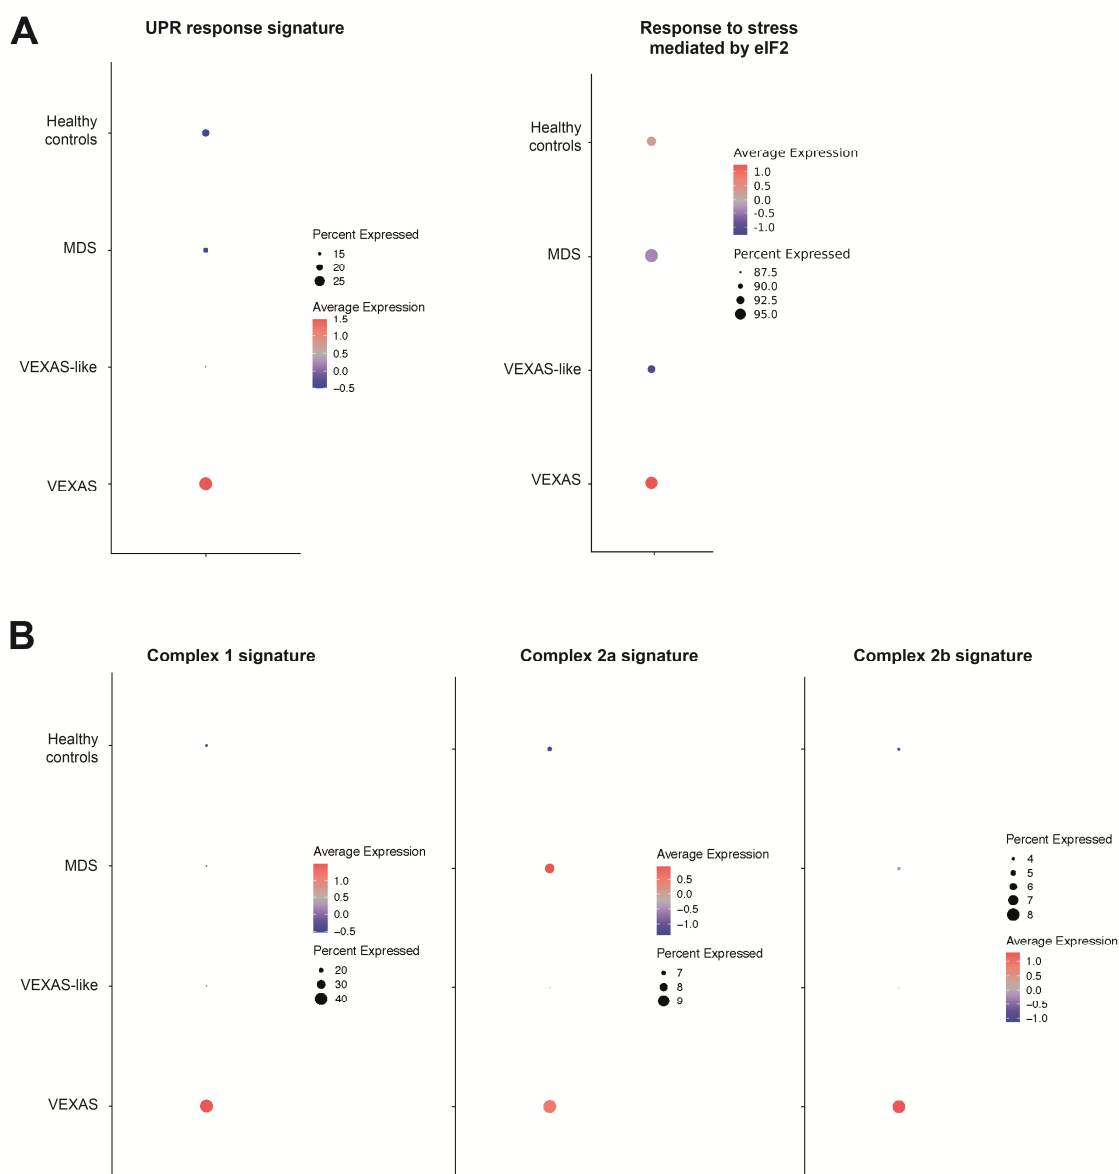

**Supplementary Fig. 12. Unfolded protein response, response to stress mediated by EIF2 and complex 1, 2ab and 2b signatures in monocytes from VEXAS syndrome.**

**(A) Unfolded protein response and response to stress mediated by EIF2** gene expression signatures in monocytes from each patients' group. **(B)** Signatures assessing the URP response and assembly of complexes involving RIPK1, i.e. complex 1, complex 2a and complex 2b, in monocytes from each patients' group. The size of the dot represents the percentage of cells in the clusters expressing the gene expression signature and the color intensity represents the average expression of the signature in that cluster.

| Characteristics                                            | Healthy controls | Myelodysplastic syndrome | VEXAS-like       | VEXAS            |
|------------------------------------------------------------|------------------|--------------------------|------------------|------------------|
| <b>Participants – no.</b>                                  | 12               | 4                        | 24               | 40               |
| <b>Demographic characteristics</b>                         |                  |                          |                  |                  |
| Male sex – no. (%)                                         | 12 (100)         | 4 (100)                  | 24 (100)         | 40 (100)         |
| Median age at onset (range) – yr                           | -                | -                        | 65 (43-82)       | 71 (50-89)       |
| Median age at time analysis (range) – yr                   | 60 (55-85)       | 76 (70-88)               | 70 (54-82)       | 74 (55-90)       |
| <b>Genetic characteristics</b>                             |                  |                          |                  |                  |
| Somatic UBA1 variant (p.Met41) – no. (%)                   | 0 (0)            | 0 (0)                    | 0 (0)            | 40 (100)         |
| p.Met41Thr (c.122TCC)                                      | -                | -                        | -                | 18 (45)          |
| p.Met41Val (c.121ACG)                                      | -                | -                        | -                | 10 (25)          |
| p.Met41Leu (c.121AQC)                                      | -                | -                        | -                | 6 (15)           |
| Splice                                                     | -                | -                        | -                | 6 (15)           |
| <b>Key clinical features</b>                               |                  |                          |                  |                  |
| Fever – no. (%)                                            | 0 (0)            | 0 (0)                    | 9 (38)           | 27 (68)          |
| Arthralgia/arthritis – no. (%)                             | 0 (0)            | 0 (0)                    | 16 (67)          | 26 (65)          |
| Skin involvement – no. (%)                                 | 0 (0)            | 0 (0)                    | 14 (58)          | 21 (53)          |
| Pulmonary infiltrate – no. (%)                             | 0 (0)            | 0 (0)                    | 1 (4)            | 14 (35)          |
| Ear and nose chondritis – no. (%)                          | 0 (0)            | 0 (0)                    | 9 (38)           | 19 (48)          |
| Venous thromboembolism – no. (%)                           | 0 (0)            | 0 (0)                    | 4 (17)           | 17 (43)          |
| Ocular inflammation – no. (%)                              | 0 (0)            | 0 (0)                    | 3 (13)           | 12 (30)          |
| Seritis – no. (%)                                          | 0 (0)            | 0 (0)                    | 4 (17)           | 7 (18)           |
| Macrocyt anemia – no. (%)                                  | 0 (0)            | 0 (0)                    | 5 (21)           | 36 (90)          |
| <b>Diagnostic or classification criteria that were met</b> |                  |                          |                  |                  |
| Relapsing polychondritis – no. (%)                         | 0 (0)            | 0 (0)                    | 9 (38)           | 19 (48)          |
| Sweet's syndrome – no. (%)                                 | 0 (0)            | 0 (0)                    | 6 (25)           | 17 (43)          |
| Myelodysplastic syndrome – no. (%)                         | 0 (0)            | 4 (100)                  | 10 (42)          | 21 (53)          |
| Polyarteritis nodosa – no. (%)                             | 0 (0)            | 0 (0)                    | 1 (4)            | 4 (10)           |
| Giant-cell arteritis/Polymyalgia rheumatica – no. (%)      | 0 (0)            | 0 (0)                    | 5 (21)           | 3 (8)            |
| <b>Laboratory findings at time analysis</b>                |                  |                          |                  |                  |
| Hemoglobin (IQR) – g/dL                                    | 15.7 (15.3-15.9) | 11.6 (9.6-13.3)          | 11.6 (10.6-13.4) | 10.0 (8.7-10.7)  |
| Mean corpuscular volume (IQR) - fL                         | 92 (89-94)       | 99 (92-105)              | 95 (91-99)       | 108 (100.5-114)  |
| Leukocytes (IQR) – x 10 <sup>9</sup> /L                    | 6.9 (6.2-8.3)    | 3.9 (2.4-5.7)            | 6.3 (4.1-7.8)    | 3.9 (2.5-5.6)    |
| Neutrophils (IQR) – x 10 <sup>9</sup> /L                   | 4.1 (3.1-5.0)    | 2.3 (1.5-2.9)            | 3.4 (2.0-6.4)    | 2.7 (1.4-3.8)    |
| Lymphocytes (IQR) – x 10 <sup>9</sup> /L                   | 2.4 (1.5-3.0)    | 1.1 (0.7-2.0)            | 1.2 (0.9-1.5)    | 0.8 (0.5-1.2)    |
| Monocytes (IQR) – x 10 <sup>9</sup> /L                     | 0.47 (0.30-0.76) | 0.51 (0.17-0.73)         | 0.59 (0.42-0.80) | 0.22 (0.14-0.31) |
| C-reactive protein (IQR) – mg/L                            | 1.3 (0.0-3.5)    | 0.0 (0.0-0.8)            | 5.0 (1.7-19.5)   | 38.6 (13.8-83.0) |
| LDH (IQR) – UI/L                                           | 237 (213-252)    | 267 (224-286)            | 275 (218-338)    | 326 (255-426)    |
| <b>Past treatment</b>                                      |                  |                          |                  |                  |
| Glucocorticoids                                            | 0 (0)            | 0 (0)                    | 22 (92)          | 37 (93)          |
| Synthetic DMARDs – no. (%)                                 | 0 (0)            | 0 (0)                    | 15 (63)          | 22 (55)          |
| Biologic or target synthetic DMARDs – no. (%)              | 0 (0)            | 0 (0)                    | 13 (54)          | 23 (58)          |
| 5-azacytidine – no. (%)                                    | 0 (0)            | 0 (0)                    | 2 (8)            | 9 (23)           |
| <b>Current treatment at time analysis</b>                  |                  |                          |                  |                  |
| Glucocorticoids – no. (%)                                  | 0 (0)            | 0 (0)                    | 17 (71)          | 34 (85)          |
| Median prednisone dose (IQR) – mg/day                      | 0 (0)            | 0 (0)                    | 10 (0-15)        | 10 (7-19)        |
| Synthetic DMARDs – no. (%)                                 | 0 (0)            | 0 (0)                    | 2 (8)            | 8 (20)           |
| Biologic or target synthetic DMARDs – no. (%)              | 0 (0)            | 0 (0)                    | 7 (29)           | 9 (23)           |
| 5-azacytidine – no. (%)                                    | 0 (0)            | 0 (0)                    | 2 (8)            | 4 (10)           |
| <b>Disease activity status at time analysis</b>            |                  |                          |                  |                  |
| Active disease – no. (%)                                   | -                | -                        | 11 (46)          | 26 (65)          |
| Inactive disease – no. (%)                                 | -                | -                        | 13 (54)          | 14 (35)          |

DMARDs: disease-modifying antirheumatic drugs; IQR: interquartile range; LDH: lactate dehydrogenase ; MDS: myelodysplastic syndrome; VEXAS: vacuoles, E1 enzyme, X-linked, autoinflammatory, somatic; UBA1: Ubiquitin Like Modifier Activating Enzyme 1.  
Laboratory values are indicated in median.

**Supplementary Table 1.** Demographic and clinical characteristics of participants included in the study.

|                                                            |                                                                                            |
|------------------------------------------------------------|--------------------------------------------------------------------------------------------|
| <b>CD8+ T cells</b>                                        | CD3+ CD66b- CD19- CD8+ CD4- CD14- CD161-<br>TCR <sup>©</sup> <sup>TM</sup> - CD123- CD11c- |
| <b>CD8 differentiation stages</b>                          |                                                                                            |
| <i>Naive</i>                                               | CCR7+ CD27+ CD45RA+                                                                        |
| <i>Central memory</i>                                      | CCR7+ CD27+ CD45RA-                                                                        |
| <i>Effector memory</i>                                     | CCR7- CD27+                                                                                |
| <i>Terminal effector</i>                                   | CCR7- CD27-                                                                                |
| <b>CD4+ T cells</b>                                        | CD3+ CD66b- CD19- CD8- CD4+ CD14- CD161-<br>TCR <sup>©</sup> <sup>TM</sup> - CD123- CD11c  |
| <b>CD4 differentiation stages</b>                          |                                                                                            |
| <i>Naive</i>                                               | CCR7+ CD27+ CD45RA+                                                                        |
| <i>Central memory</i>                                      | CCR7+ CD27+ CD45RA-                                                                        |
| <i>Effector memory</i>                                     | CCR7- CD27+ CD45RA-                                                                        |
| <i>Terminal effector</i>                                   | CCR7- CD27- CD45RA-                                                                        |
| <b>CD4 polarization stages</b>                             |                                                                                            |
| <i>Th1</i>                                                 | CXCR3+ CCR6- CCR4- CXCR5-                                                                  |
| <i>Th2</i>                                                 | CXCR3- CCR6- CCR4+ CXCR5-                                                                  |
| <i>Th17</i>                                                | CXCR3- CCR6+ CCR4+ CXCR5-                                                                  |
| <i>Regulatory T cells</i>                                  | CD25+ CD127- CCR4+ HLA-DR-                                                                 |
| <b>©<sup>TM</sup> T cells</b>                              | CD3+ CD66b- CD14- CD8dim CD4- TCR <sup>©</sup> <sup>TM</sup> +                             |
| <b>Natural killer (NK) cells</b>                           | CD14- CD3- CD123- CD66b- CD45RA+ CD56+                                                     |
| <b>Mucosal-associated invariant T (MAIT) and NKT cells</b> | CD3+ CD66b- CD19- CD4- CD14- CD161+ TCR <sup>©</sup> <sup>TM</sup> -<br>CD28+ CD16-        |
| <b>B cells</b>                                             | CD3- CD14- CD56- CD16- CD19+ CD20+ HLA-DR+                                                 |
| <b>Plasmablasts</b>                                        | CD3- CD14- CD16- CD66b- CD20- CD19+ CD56-<br>CD38++ CD27++                                 |
| <b>Dendritic cells (DC)</b>                                |                                                                                            |
| pDC                                                        | CD3- CD19- CD14- CD20- CD66b- HLA-DR+ CD11c-<br>CD123+                                     |
| mDC                                                        | CD3- CD19- CD14- CD20- HLA-DR+ CD11c+ CD123-<br>CD16- CD38+ CD294-                         |
| <b>Monocytes</b>                                           | CD3- CD19- CD56- CD66b- CD14+ HLA-DR+ CD11c+                                               |
| <i>Classical</i>                                           | CD14+ CD38+                                                                                |
| <i>Transitional</i>                                        | CD14 <sup>low</sup> CD38 <sup>low</sup>                                                    |
| <i>Non-classical</i>                                       | CD14- CD38-                                                                                |
| <b>Neutrophils</b>                                         | CD66b+ CD16+ HLA-DR-                                                                       |

**Supplementary Table 2.** Phenotypic definition of immune cell populations.

|                                              |                                                                                                                                                                                                                                                                                                                                                                                                               |
|----------------------------------------------|---------------------------------------------------------------------------------------------------------------------------------------------------------------------------------------------------------------------------------------------------------------------------------------------------------------------------------------------------------------------------------------------------------------|
| <b>Type II IFN (IFN-<math>\gamma</math>)</b> | <i>CDKN1A, CXCL9, HLA-DMB, HLA-DPA1, HLA-DPB1, HLA-DRA, IDO1, JAK2, RARRES3, SLAMF7, SOCS1</i>                                                                                                                                                                                                                                                                                                                |
| <b>TNF-<math>\alpha</math></b>               | <i>C3, CCL4, CD44, CD83, IRAK2, NFKB2, NFKBIA, RELB, SOCS3, SRC, TNFAIP3</i>                                                                                                                                                                                                                                                                                                                                  |
| <b>IL-1<math>\beta</math></b>                | <i>CCL2, CCL20, CXCL2, IL1A, IL1B, IL6, LILRB1, NFKB1, NFKBIZ, POU2F2</i>                                                                                                                                                                                                                                                                                                                                     |
| <b>IL-18</b>                                 | <i>ARG1, B2M, BAX, BCL2, BID, CASP3, CASP8, CCL18, CCL19, CCL2, CCL20, CCL3, CCL4, CCL5, CD36, CD81, CD83, CEBPB, CHUK, CTNNB1, CXCL2, FADD, FAS, FN1, ICAM1, IFNG, IKBKB, IL10, IL12B, IL13, IL18, IL18R1, IL18RAP, IL1B, IL2RA, IL6, IL9, IRAK1, IRF1, ITGA2B, LCK, MAPK1, MYD88, NFKB1, NFKB2, NFKBIA, NFKBIZ, NOS2, PRKCD, PTGS2, RELA, SOCS3, SPP1, TBX21, TNF, TNFAIP3, TNFSF11, TP53, TRAF1, TRAF6</i> |
| <b>IL-6</b>                                  | <i>CEBP, HRAS, IL6, IL6R, IL6ST, JAK1, JAK2, JAK3, RAF1, STAT3</i>                                                                                                                                                                                                                                                                                                                                            |
| <b>NF-<math>\kappa</math>B</b>               | <i>CHUK, FADD, IKBKB, IKBKG, IL1A, IL1R1, MYD88, NFKB1, NFKBIA, RELA, TNF, TNFAIP3, TNFRSF1B, TRAF6</i>                                                                                                                                                                                                                                                                                                       |

**Supplementary Table 3.** List of genes used to calculate zScores for each gene signature. Type I IFN, type II IFN, TNF- $\alpha$  and IL-1 $\beta$  signatures based on the study by Urrutia et al. (Cell Reports, 2016). IL-18 and IL-6 signatures based on Wikipathway. NF- $\kappa$ B signature based on the Nanostring Immunology panel annotation file.

| <b>Top down-regulated gene in VEXAS vs healthy controls comparison (q-value &lt;0.05)</b> |                 |                |
|-------------------------------------------------------------------------------------------|-----------------|----------------|
| <b>Genes</b>                                                                              | <b>estimate</b> | <b>q.value</b> |
| CCR2                                                                                      | -1,29091465     | 0,00059618     |
| CSF1R                                                                                     | -1,26597199     | 3,3271E-06     |
| CMKLR1                                                                                    | -1,16080021     | 0,00035086     |
| CIITA                                                                                     | -1,10797175     | 0,00100311     |
| MSR1                                                                                      | -1,07144846     | 0,00299568     |
| CX3CR1                                                                                    | -1,03623855     | 5,718E-06      |
| CASP10                                                                                    | -1,00440294     | 0,00358072     |
| CD86                                                                                      | -0,94407751     | 0,00110443     |
| CISH                                                                                      | -0,92904526     | 0,00110243     |
| CXCR2                                                                                     | -0,90006158     | 0,00126545     |
| <b>Top up-regulated gene in VEXAS vs healthy controls comparison (q-value &lt;0.05)</b>   |                 |                |
| <b>Genes</b>                                                                              | <b>estimate</b> | <b>q.value</b> |
| PLAU                                                                                      | 1,51719999      | 6,1809E-06     |
| NFKBIA                                                                                    | 1,18716352      | 1,0453E-08     |
| LTF                                                                                       | 1,17874396      | 0,00045728     |
| TNFAIP3                                                                                   | 1,08554059      | 3,105E-09      |
| CTSG                                                                                      | 1,07519794      | 0,00126741     |
| CEACAM6                                                                                   | 0,96033142      | 0,00188861     |
| CXCL2                                                                                     | 0,94350556      | 0,00125594     |
| CEACAM8                                                                                   | 0,91528168      | 0,00280908     |
| CCL20                                                                                     | 0,88154015      | 0,00088693     |
| CD83                                                                                      | 0,8808809       | 5,718E-06      |

**Supplementary Table 4. Top down-regulated and up-regulated genes in VEXAS patients compared to healthy controls.**



|                                                                                                  |
|--------------------------------------------------------------------------------------------------|
| <b>Down-regulated genes common in VEXAS in comparison to healthy controls (q-value &lt;0.05)</b> |
| IL16, CD244, TP53, IKBKB, NFATC3, MBP, RORC, IKBKAP, IL7R, CISH                                  |
| <b>Up-regulated genes common in VEXAS in comparison to healthy controls (q-value &lt;0.05)</b>   |
| TNFAIP3, NFKBIA, RELB, NFKBIZ, CD83, PLAU, PSMD7, TRAF6, ICAM1, CTNNB1                           |

**Supplementary Table 5. Top down-regulated and up-regulated genes common in VEXAS and VEXAS like patients in comparison to healthy controls.**

| SampleID   | pipeline | Status       | nCells | nFeature_median | nCount_median | MT_median | Ribo_median |
|------------|----------|--------------|--------|-----------------|---------------|-----------|-------------|
| CONTROL1   | SCT      | Filtered     | 5466   | 1430            | 4482          | 6         | 29          |
| CONTROL1   | SCT      | Pre-filtered | 9426   | 949             | 2326          | 8         | 22          |
| CONTROL2   | SCT      | Filtered     | 5814   | 1602            | 5352          | 5         | 35          |
| CONTROL2   | SCT      | Pre-filtered | 7887   | 1418            | 4584          | 6         | 29          |
| MDS1       | SCT      | Filtered     | 10565  | 1185            | 3637          | 7         | 29          |
| MDS1       | SCT      | Pre-filtered | 19802  | 706             | 1691          | 10        | 22          |
| MDS2       | SCT      | Filtered     | 12181  | 1162            | 3768          | 5         | 34          |
| MDS2       | SCT      | Pre-filtered | 16804  | 1002            | 3022          | 6         | 29          |
| VEXAS1     | SCT      | Filtered     | 8986   | 1203            | 3918          | 6         | 36          |
| VEXAS1     | SCT      | Pre-filtered | 16802  | 653             | 1914          | 7         | 23          |
| VEXAS2     | SCT      | Filtered     | 3668   | 924             | 2949          | 5         | 33          |
| VEXAS2     | SCT      | Pre-filtered | 8614   | 416             | 1556          | 6         | 12          |
| VEXASLIKE1 | SCT      | Filtered     | 7624   | 1166            | 2799          | 4         | 19          |
| VEXASLIKE1 | SCT      | Pre-filtered | 10963  | 941             | 2057          | 4         | 16          |
| VEXASLIKE2 | SCT      | Filtered     | 13689  | 1423            | 4198          | 7         | 31          |
| VEXASLIKE2 | SCT      | Pre-filtered | 15603  | 1353            | 3936          | 7         | 31          |

**Supplementary Table 6 : Quality control parameters of scRNA-Seq data**
